# Supplementary material
Source: Elsevier journal article supplement (https://comptes-rendus.academie-sciences.fr/geoscience/article/10.1016/j.crte.2015.05.007/file/attach/mmc2.pdf)
Supplement: mmc2 [file mmc2.pdf]

Table S2. Modeled reactions rates

| Segment | $J_{sfr}^l$              | $J_{was}^l$              | $J_{met}^l$              | $k_{ixc}$               | $\overline{J_{ixc}^{eq}}$ | $k_{dol}$               | $\overline{J_{dol}^{eq}}$ | $k_{cal}$               | $\overline{J_{cal}^{eq}}$ |
|---------|--------------------------|--------------------------|--------------------------|-------------------------|---------------------------|-------------------------|---------------------------|-------------------------|---------------------------|
|         | ( $\mu\text{mol/L/yr}$ ) | ( $\mu\text{mol/L/yr}$ ) | ( $\mu\text{mol/L/yr}$ ) | ( $10^{-4}/\text{yr}$ ) | ( $\mu\text{mol/L/yr}$ )  | ( $10^{-4}/\text{yr}$ ) | ( $\mu\text{mol/L/yr}$ )  | ( $10^{-4}/\text{yr}$ ) | ( $\mu\text{mol/L/yr}$ )  |
| S1 - W1 | 1.5                      | 0                        | 3.9                      | 6.8                     | 5.7                       | 3.3                     | 1.1                       | 4.0                     | 0.21                      |
| W1 - W3 | 0                        | 0                        | 1.9                      | 7.5                     | 2.3                       | 4.0                     | 0.64                      | 9.9                     | 0.23                      |
| W3 - W6 | 0                        | 0                        | 0.40                     | 9.4                     | 0.28                      | 0                       | 0                         | 0                       | 0                         |
| W6 - W9 | 0                        | 0.086                    | 3.5                      | n.d.                    | 1.0                       | 0                       | 0                         | 0                       | 0                         |
